# Supplementary material for: Strong ferroelectric polarization of CH3NH3GeI3 with high-absorption and mobility transport anisotropy: theoretical study
Source: Royal Society of Chemistry journal article supplement (doi:10.1039/c7tc01166k), 2017-01-01
Supplement: c7tc01166k1.pdf [file c7tc01166k1.pdf]

## Supporting Information

**The experimental atomic coordinate given below are used to analysis the ferroelectric polarization.**

Space group name P 1

Lattice parameters

| a       | b       | c        | alpha   | beta    | gamma    |
|---------|---------|----------|---------|---------|----------|
| 8.55340 | 8.55340 | 11.16200 | 90.0000 | 90.0000 | 120.0000 |

|    |    |     | x       | y       | z       | Occ.  | B     | Site | Sym. |
|----|----|-----|---------|---------|---------|-------|-------|------|------|
| 1  | Ge | Ge1 | 0.00000 | 0.00000 | 0.46830 | 1.000 | 1.000 | 1a   | 1    |
| 2  | Ge | Ge2 | 0.66667 | 0.33333 | 0.80163 | 1.000 | 1.000 | 1a   | 1    |
| 3  | Ge | Ge3 | 0.33333 | 0.66667 | 0.13497 | 1.000 | 1.000 | 1a   | 1    |
| 4  | C  | C4  | 0.00000 | 0.00000 | 0.00200 | 1.000 | 1.000 | 1a   | 1    |
| 5  | C  | C5  | 0.66667 | 0.33333 | 0.33533 | 1.000 | 1.000 | 1a   | 1    |
| 6  | C  | C6  | 0.33333 | 0.66667 | 0.66867 | 1.000 | 1.000 | 1a   | 1    |
| 7  | N  | N7  | 0.00000 | 0.00000 | 0.87900 | 1.000 | 1.000 | 1a   | 1    |
| 8  | N  | N8  | 0.66667 | 0.33333 | 0.21233 | 1.000 | 1.000 | 1a   | 1    |
| 9  | N  | N9  | 0.33333 | 0.66667 | 0.54567 | 1.000 | 1.000 | 1a   | 1    |
| 10 | I  | I10 | 0.50485 | 0.49515 | 0.92640 | 1.000 | 1.000 | 1a   | 1    |
| 11 | I  | I11 | 0.17152 | 0.82848 | 0.25973 | 1.000 | 1.000 | 1a   | 1    |
| 12 | I  | I12 | 0.83818 | 0.16182 | 0.59307 | 1.000 | 1.000 | 1a   | 1    |
| 13 | I  | I13 | 0.50485 | 0.00970 | 0.92640 | 1.000 | 1.000 | 1a   | 1    |
| 14 | I  | I14 | 0.17152 | 0.34303 | 0.25973 | 1.000 | 1.000 | 1a   | 1    |
| 15 | I  | I15 | 0.83818 | 0.67637 | 0.59307 | 1.000 | 1.000 | 1a   | 1    |
| 16 | I  | I16 | 0.99030 | 0.49515 | 0.92640 | 1.000 | 1.000 | 1a   | 1    |
| 17 | I  | I17 | 0.65697 | 0.82848 | 0.25973 | 1.000 | 1.000 | 1a   | 1    |
| 18 | I  | I18 | 0.32363 | 0.16182 | 0.59307 | 1.000 | 1.000 | 1a   | 1    |
| 19 | H  | H19 | 0.40397 | 0.80795 | 0.51252 | 1.000 | 1.000 | 1a   | 1    |
| 20 | H  | H20 | 0.19205 | 0.59603 | 0.51252 | 1.000 | 1.000 | 1a   | 1    |
| 21 | H  | H21 | 0.37089 | 0.56407 | 0.70271 | 1.000 | 1.000 | 1a   | 1    |
| 22 | H  | H22 | 0.19318 | 0.62911 | 0.70271 | 1.000 | 1.000 | 1a   | 1    |
| 23 | H  | H23 | 0.43593 | 0.80682 | 0.70271 | 1.000 | 1.000 | 1a   | 1    |
| 24 | H  | H24 | 0.42795 | 0.61661 | 0.51361 | 1.000 | 1.000 | 1a   | 1    |
| 25 | H  | H25 | 0.59412 | 0.18824 | 0.36938 | 1.000 | 1.000 | 1a   | 1    |
| 26 | H  | H26 | 0.59412 | 0.40588 | 0.36938 | 1.000 | 1.000 | 1a   | 1    |
| 27 | H  | H27 | 0.81176 | 0.40588 | 0.36938 | 1.000 | 1.000 | 1a   | 1    |
| 28 | H  | H28 | 0.70323 | 0.23343 | 0.17919 | 1.000 | 1.000 | 1a   | 1    |
| 29 | H  | H29 | 0.76657 | 0.46980 | 0.17919 | 1.000 | 1.000 | 1a   | 1    |
| 30 | H  | H30 | 0.51356 | 0.28393 | 0.15348 | 1.000 | 1.000 | 1a   | 1    |

|    |   |     |         |         |         |       |       |    |   |
|----|---|-----|---------|---------|---------|-------|-------|----|---|
| 31 | H | H31 | 0.02611 | 0.11554 | 0.81992 | 1.000 | 1.000 | 1a | 1 |
| 32 | H | H32 | 0.87427 | 0.86867 | 0.85460 | 1.000 | 1.000 | 1a | 1 |
| 33 | H | H33 | 0.09650 | 0.94083 | 0.85239 | 1.000 | 1.000 | 1a | 1 |
| 34 | H | H34 | 0.94870 | 0.85297 | 0.02692 | 1.000 | 1.000 | 1a | 1 |
| 35 | H | H35 | 0.94870 | 0.06320 | 0.07009 | 1.000 | 1.000 | 1a | 1 |
| 36 | H | H36 | 0.15390 | 0.07695 | 0.00200 | 1.000 | 1.000 | 1a | 1 |

### Analysis the ferroelectric polarization via classic point charge model method

Firstly, we expand the primitive cell to the  $3 \times 3 \times 3$  super cell, then cut off one unit cell given below to predict its ferroelectric polarization via the point charge model method. The unit cell's atomic coordinates that we choose are listed as follows:

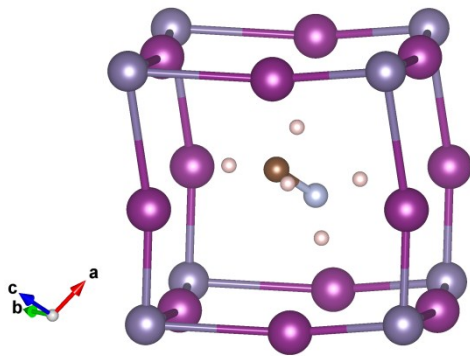

Figure S1: The primitive cell of MAGeI3.

|     | X       | y       | z       |     | X       | y       | z       |
|-----|---------|---------|---------|-----|---------|---------|---------|
| I1  | 0.58576 | 0.41424 | 0.62987 | Ge1 | 0.5     | 0.5     | 0.73415 |
| I2  | 0.58576 | 0.67152 | 0.62987 | Ge2 | 0.16667 | 0.33334 | 0.56748 |
| I3  | 0.75242 | 0.74757 | 0.46320 | Ge3 | 0.33334 | 0.66667 | 0.40082 |
| I4  | 0.75242 | 0.74757 | 0.46320 | Ge4 | 0.66667 | 0.83334 | 0.56748 |
| I5  | 0.75242 | 0.50485 | 0.46320 | Ge5 | 0.66667 | 0.33334 | 0.56748 |
| I6  | 0.32849 | 0.41424 | 0.62987 | Ge6 | 0.33334 | 0.16667 | 0.40082 |
| I7  | 0.49515 | 0.74757 | 0.46320 | Ge7 | 0.5     | 0.5     | 0.23415 |
| I8  | 0.66182 | 0.58091 | 0.29635 | Ge8 | 0.83334 | 0.66667 | 0.40082 |
| I9  | 0.25242 | 0.50485 | 0.46320 |     |         |         |         |
| I10 | 0.41909 | 0.58091 | 0.29653 |     |         |         |         |
| I11 | 0.41909 | 0.33819 | 0.29653 |     |         |         |         |
| I12 | 0.25242 | 0.24757 | 0.46320 |     |         |         |         |
|     | X       | Y       | Z       |     |         |         |         |
| C   | 0.5     | 0.5     | 0.50100 |     |         |         |         |
| N   | 0.5     | 0.5     | 0.43950 |     |         |         |         |

The equivalent charge center of  $\text{Ge}^{2+}$  and  $\text{I}^-$  ions can be calculated by using the

formula:  $X_C = \frac{\sum q_i x_i}{\sum q_i}$ ,  $Y_C = \frac{\sum q_i y_i}{\sum q_i}$ ,  $Z_C = \frac{\sum q_i z_i}{\sum q_i}$ ,  $x_i$ ,  $y_i$  and  $z_i$  refer to the atomic

coordinates. The  $q_i$  refers to the charge. For Ge ions,  $q_i = +2e$ , for I ions,  $q_i = -e$ .

The calculated atomic coordinates of equivalent charge center of I<sup>-</sup> ions are:

$$(0.501665 \quad 0.4999 \quad 0.4632)$$

Also the calculated atomic coordinates of equivalent charge center of Ge<sup>2+</sup> ions are:

$$(0.501665 \quad 0.5000 \quad 0.48415)$$

The atomic coordinates of positive charge center of MA cation are (0.5 0.5 0.477)

due to the most positive charge localized on the NH<sub>3</sub> group. Thus, the calculated relative position  $r$  between Ge<sup>2+</sup> and I<sup>-</sup> ions is mainly along the  $c$  axis, equaling to 0.7Å. The displacement  $r$  between MA cation and I<sup>-</sup> ions is 0.3103Å along the  $c$  axis.

The volume of the unit cell is  $V=236 \text{ \AA}^3$ . Via point charge model method,  $P_{Ge-I} = \frac{qr}{V} = \frac{2e \times 0.7 \text{ \AA}}{236 \text{ \AA}^3} = 10.37 \mu\text{C}/\text{cm}^3$ .  $p_{MA-I} = \frac{qr}{V} = \frac{e \times 0.3103 \text{ \AA}}{236 \text{ \AA}^3} = 2.1 \mu\text{C}/\text{cm}^3$ . Here  $e=1.6 \times 10^{-19}$

C. The calculated  $p_{MA-I} = 2.1 \mu\text{C}/\text{cm}^3$  via classic point charge model is accord with the results  $2.4 \mu\text{C}/\text{cm}^3$  via berry phase method. Although the  $P_{Ge-I}$  via point charge model is less than the results via berry phase method, but two methods all predict a huge ferroelectric polarization along the  $c$  axis.

### **Analysis spin-orbit coupling(SOC) effect**

The material of CH<sub>3</sub>NH<sub>3</sub>GeI<sub>3</sub> regarded as solar cell candidates with high performance won't be affected by spin-orbit coupling(SOC) effects. This is because that the Ge(No.32) element at conduction band bottom(CBM) is not so heavy

compared with the traditional heavy metal, which locate after No. 53 in periodic table. Only the atomic number greater than No.53 such as Pb, Bi, Po can be affected by SOC effects markedly. Based on the above consideration, the SOC effects will not be considered in perovskite  $\text{CH}_3\text{NH}_3\text{GeI}_3$ .

### Elastic constants tensor calculation

We employed more tense  $12 \times 12 \times 10$  k-meshes to calculate the elastic constants tensor  $C_{ii}$  by using the optimized structure as the  $C_{ii}$  is sensitive to high-precision energy  $\Delta E$  take a derivative with respect to lattice dilation  $\Delta l$ . The calculated  $C_{ii}$  is sixth-order tensor listed below:

| Direction | XX       | YY        | ZZ       | XY       | YZ        | ZX       |
|-----------|----------|-----------|----------|----------|-----------|----------|
| XX        | 60.9849  | 152.3917  | 38.4627  | 20.6224  | 63.2060   | -21.3717 |
| YY        | 152.3917 | 114.6264  | 114.6710 | -60.3804 | -140.9847 | -21.5302 |
| ZZ        | 38.4627  | 114.6710  | 150.4557 | 11.8469  | 34.5352   | -19.7120 |
| XY        | 20.6224  | -60.3804  | 11.8469  | 14.1335  | -24.2668  | 9.3426   |
| YZ        | 63.2060  | -140.9847 | 34.5352  | -24.2668 | -14.3295  | -18.9308 |
| ZX        | -21.3717 | -21.5302  | -19.7120 | 9.3426   | -18.9308  | -50.1378 |

### Deformation potential calculation

The deformation potential constant  $E^i$  of the VBM for hole or CBM for electron along  $[1\ 0\ 0]$ ,  $[0\ 1\ 0]$  and  $[0\ 0\ 1]$  direction are defined as energy change  $\Delta E$  as the function of deformation of lattice  $\Delta l/l_0$ . Here  $\Delta l/l_0$  are expressed as:  $0.990l_0$ ,  $0.995$

$l_0, 1.000l_0, 1.005l_0$  and  $1.010l_0$ . We only listed calculated deformation potential constant  $E^i$  as below due to highest carrier mobility along [0 0 1] direction.

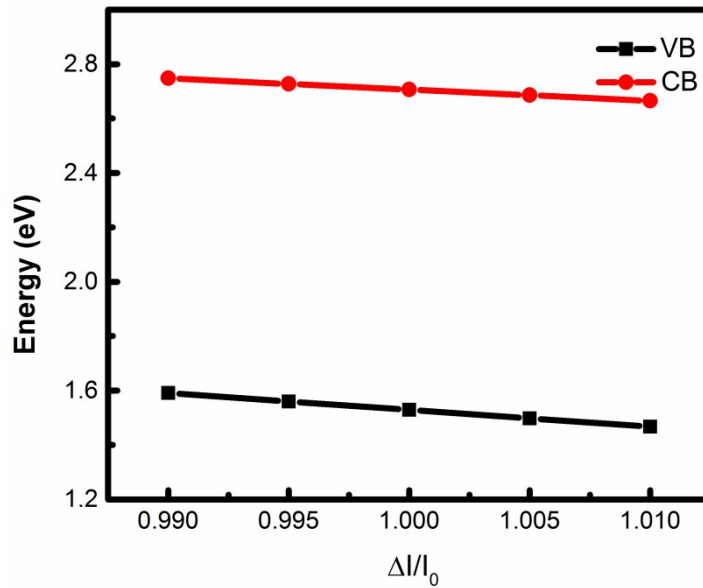

## Appendix:

### The code for calculating the ferroelectric polarization

```

parameter (natom=20)

double                                          precision

ionw(natom,3),ionw0(natom,3),iondw(natom,3),iondw0(natom,3),polax,polay,polaz

double precision  x(natom,3),x2(natom,3),xx(natom,3),xx2(natom,3)

double precision pol(3),pold(3)

double precision  polat(3),polae(3),polai(3),polai0(3)

double precision  polatc(3),polaec(3),polaic(3),polaic0(3)

double precision  b2(3,3),c2(3,3),IS(4),JS(4)

character(2) ch

double precision A1(3,3),a2(3,3),latticea,latticeb,latticec,alfa,beta,seta,volum

```

```
natom1=3; natom2=3; natom3=3; natom4=9; natom5=18
```

```
val1=4.0; val2=4.0; val3=5.0; val4=7.0; val5=1.0;
```

```
pol(1)=0.6136;    pol(2)= -0.37472;    pol(3)= 5.85605
```

```
!!!!!!!!!!!!!!! read cell file "cell"
```

```
open(10,file='CONTCAR')
```

```
open(11,file='POSCAR')
```

```
read(10,*)
```

```
read(10,*)cons2
```

```
READ(11,*)
```

```
READ(11,*)CONS1
```

```
do i=1,3
```

```
  read(10,*)(a2(i,j),j=1,3)
```

```
  READ(11,*)(A1(I,J),J=1,3)
```

```
enddo
```

```
read(10,*)
```

```
read(10,*)
```

```
read(10,*)
```

```
read(11,*)
```

```
read(11,*)
```

```
read(11,*)
```

```

do i=1,natom

    read(10,*)(xx(i,j),j=1,3)

    read(11,*)(x(i,j),j=1,3)

enddo

close(10)

close(11)

A1=A1*CONS1

a2=a2*cons2

latticea=sqrt(a2(1,1)*a2(1,1)+a2(1,2)*a2(1,2)+a2(1,3)*a2(1,3))

latticeb=sqrt(a2(2,1)*a2(2,1)+a2(2,2)*a2(2,2)+a2(2,3)*a2(2,3))

latticec=sqrt(a2(3,1)*a2(3,1)+a2(3,2)*a2(3,2)+a2(3,3)*a2(3,3))

alfa=acosd((a2(2,1)*a2(3,1)+a2(2,2)*a2(3,2)+a2(2,3)*a2(3,3))/latticeb/latticec)

beta=acosd((a2(1,1)*a2(3,1)+a2(1,2)*a2(3,2)+a2(1,3)*a2(3,3))/latticea/latticec)

seta=acosd((a2(1,1)*a2(2,1)+a2(1,2)*a2(2,2)+a2(1,3)*a2(2,3))/latticea/latticeb)

volum=latticea*latticeb*latticec*dsqrt(1-cosd(alfa)**2-cosd(beta)**2-
cosd(seta)**2 &
+2*cosd(alfa)*cosd(beta)*cosd(seta))

!!!!!!! ions location polariztion

do i=1,natom

    if (i<=natom1) then

```

```
iondw0(i,:)=(x(i,:))*val1
```

```
iondw(i,:)=(xx(i,:))*val1
```

```
elseif (i<=natom1+natom2) then
```

```
iondw0(i,:)=(x(i,:))*val2
```

```
iondw(i,:)=(xx(i,:))*val2
```

```
elseif (i<=natom1+natom2+natom3) then
```

```
iondw0(i,:)=(x(i,:))*val3
```

```
iondw(i,:)=(xx(i,:))*val3
```

```
elseif (i<=natom1+natom2+natom3+natom4) then
```

```
iondw0(i,:)=(x(i,:))*val4
```

```
iondw(i,:)=(xx(i,:))*val4
```

```
elseif (i<=natom1+natom2+natom3+natom4+natom5) then
```

```
iondw0(i,:)=(x(i,:))*val5
```

```
iondw(i,:)=(xx(i,:))*val5
```

```
endif
```

```
enddo
```

```
do i=1,natom
```

```
polai0(:)=polai0(:)+iondw0(i,:)
```

```
polai(:)=polai(:)+iondw(i,:)
```

```
enddo
```



!!!!!!!!!!!!!!!!!!!!!! transvert cartesian to fractional coordinates

b2=a2

call BRINV(b2,3,L,IS,JS)

do j=1,3

do k=1,3

polae(j)=polae(j)+pol(k)\*b2(k,j)

enddo

enddo

!!!!!!!!!!!!!!!!!!!!!!

! polat(:)=dmod(-polae(:)+polai(:)-polai0(:),1.0)

! write(\*,\*)-polae(:)

! write(\*,\*)polai(:)

polat(:)=dmod(-polae(:)+polai(:),1.0)

polai(:)=dmod(polai(:),1.0)

polat(1)=polat(1)-1.0

polat(2)=polat(2)-1.0

polat(3)=polat(3)-1.0

```
write(*,'(a,3f10.3)')"e+ion fractional", (polat(i),i=1,3)
```

```
polatc(:)=0.0
```

```
do j=1,3
```

```
do k=1,3
```

```
polatc(j)=polatc(j)+polat(k)*a2(k,j)
```

```
polaec(j)=polaec(j)+polae(k)*a2(k,j)
```

```
polaic(j)=polaic(j)+polai(k)*a2(k,j)
```

```
enddo
```

```
enddo
```

```
polatc(:)=polatc(:)*16.0/volum
```

```
polaec(:)=polaec(:)*16.0/volum
```

```
polaic(:)=polaic(:)*16.0/volum
```

```
write(*,'(a,3f10.4)') "p[elc]=", (-polaec(j),j=1,3)
```

```
write(*,'(a,3f10.4)') "p[ion]=", (polaic(j),j=1,3)
```

```
write(*,'(a,3f10.4,a)') "P[e+i]", (polatc(j),j=1,3), " C/m^2"
```

```
open(11,file='pol.dat')
```

```
write(11,'(3f10.5)')(polatc(j),j=1,3)
```

```
close(1)
```



```

        END IF
20      FORMAT(1X,'ERR**NOT INV')

        DO 30 J=1,N

            T=A(K,J)

            A(K,J)=A(IS(K),J)

            A(IS(K),J)=T
30      CONTINUE

        DO 40 I=1,N

            T=A(I,K)

            A(I,K)=A(I,JS(K))

            A(I,JS(K))=T
40      CONTINUE

        A(K,K)=1/A(K,K)

        DO 50 J=1,N

            IF (J.NE.K) THEN

                A(K,J)=A(K,J)*A(K,K)

            END IF

50      CONTINUE

        DO 70 I=1,N

            IF (I.NE.K) THEN

                DO 60 J=1,N

                    IF (J.NE.K) THEN

```

```

        A(I,J)=A(I,J)-A(I,K)*A(K,J)

        END IF

60      CONTINUE

        END IF

70      CONTINUE

        DO 80 I=1,N

            IF (I.NE.K) THEN

                A(I,K)=-A(I,K)*A(K,K)

            END IF

80      CONTINUE

100     CONTINUE

        DO 130 K=N,1,-1

            DO 110 J=1,N

                T=A(K,J)

                A(K,J)=A(JS(K),J)

                A(JS(K),J)=T

110     CONTINUE

            DO 120 I=1,N

                T=A(I,K)

                A(I,K)=A(I,IS(K))

                A(I,IS(K))=T

120     CONTINUE

```

130 CONTINUE

RETURN

END
